# Supplementary material for: The Effect of West Nile Virus Infection on the Midgut Gene Expression of Culex pipiens quinquefasciatus Say (Diptera: Culicidae)
Source: MDPI journal article supplement (doi:10.3390/insects7040076), 2016-12-19
Supplement: s1 [file s1]

# Supplementary Materials: The Effect of West Nile Virus Infection on the Midgut Gene Expression of *Culex pipiens quinquefasciatus* Say (Diptera: Culicidae)

Chelsea T. Smartt, Dongyoung Shin and Sheri L. Anderson

|                         |                                                                                                 |
|-------------------------|-------------------------------------------------------------------------------------------------|
| CQ G1A1 partial protein | ..... <u>L NHRDNSFVEDGVL YLKP</u> 18                                                            |
| CQ GNBP                 | VDRKAFCPGELLFEDNFDL DLDRTG- ..... S ..... 105                                                   |
| BM b1,3 glucan rec P-4  | AP- VTVCSGQLI FADDFVDFDLEKQWHEHTLAGGGNWEFQYYN. N. T. . . . TNN. L. . I. R. 88                   |
| Ae GNBP                 | VYRKTFCSGDLI FEDNFDKLNLEKWEHEHTLGGGGNWEFQYY. . N. K. . Y. . N. I. . I. R. 104                   |
| An GNBP-B               | VKRSAFCPGDLI FEDNFDRLDLERWQHEVTLAGGGNWEFQYY. . S. R. . . . K. . I FFI R. 87                     |
| CQ G1A1 partial protein | <u>TFI GLEPGGEEYLKTGKLDI NGGDPGNFCTNPAWDGCVRTGTPESI LNPVKSARI RTAHS</u> 78                      |
| CQ GNBP                 | ..... 165                                                                                       |
| BM b1,3 glucan rec P-4  | SLTSDQF. - SAF. HS. R. N. E. . A. ADR. . . . Q. Y. . E. V. . . . TN. . . . I. . . . . VN. 147   |
| Ae GNBP                 | . LLAD. T. . . . F. TS. T. NL. . . . S. YDS. . . . . E. . . . . NP. . . . I. . . . L. . LK. 163 |
| An GNBP-B               | . LLAD. T. . . . F. SS. N. NVH. . T. YD. . . . . SNY. . E. Q. S. TNY. . . I. . . . V. . VN. 146 |
| CQ G1A1 partial protein | <u>FNFKYGKLEI RAKLPTGDWMPALWLMPRTNQYGTWPASGEI DLMEARCNVDYRDEEGTH</u> 138                        |
| CQ GNBP                 | ..... 225                                                                                       |
| BM b1,3 glucan rec P-4  | . S. Q. . . V. V. . . M. S. . . L. . . I. . . . AY. K. . . . . V. S. G. KNMF- LN. L. 206        |
| Ae GNBP                 | ..... L. . . . . KL. . . . . T. . . . . S. G. L. . . VAD. . . 223                               |
| An GNBP-B               | . . . R. . . V. . . . . I. . . . . L. . . . . KI. . . . . S. . . . . S. G. L. . S- VN. NQ 205   |
| CQ G1A1 partial protein | <u>LGVEQVLSTLHFGNPAWTNAYDTSTAPKNSASGQGFNKDFHRYQLEWTPPEFMKFSVDGEH</u> 198                        |
| CQ GNBP                 | ..... 285                                                                                       |
| BM b1,3 glucan rec P-4  | I. TQEAG. . . . Y. . FPGLSGWERAHWRRNSA. - - YDTN. . . . . D. I S. RI. DSE 264                   |
| Ae GNBP                 | I. . . . . G. . . . . PSL. GFE. . . . A. . . . P. E. . . N. . . . . Y. . . . . D. E 283         |
| An GNBP-B               | . . . . H. GT. . . . . QWDL. G. EMA. . V. . . PK. . . . . G. . . . . R. . . . D. Q 265          |
| CQ G1A1 partial protein | <u>ILQVD- - GNFWRQGNFDERAPGTRNPWWSGTKMAPFDQEFFI I LNLAI GGTNGYFPDEK</u> 255                     |
| CQ GNBP                 | ..... 342                                                                                       |
| BM b1,3 glucan rec P-4  | . GR. APGN. G. . EY. G. NN. . . . I H. . . RY. S. . . . . K. YL. I. . . V. . . . F. . . G- 322  |
| Ae GNBP                 | T. V. . . . . Q. . . . . P. . . I. . G. . . . . E. . HV. M. . . V. . . . . PP 340               |
| An GNBP-B               | VM. . E- . . . . EL. R. . . . R. . VQ. . . . T. G. . . . . Y. . M. . V. . . . F. . . VP 322     |
| CQ G1A1 partial protein | <u>- VVN- TKPKPWSNQSVPVGPAMTSFWEKRDDWLPTWLDI NDGKDAAFQI DYVRI WAL.</u> 311                      |
| CQ GNBP                 | ..... 397                                                                                       |
| BM b1,3 glucan rec P-4  | . . K. - PI. . . . W. N. . T- - A. D. . NGQGG. . . . . NV. . . Q. . SL. V. . . V. . . 375       |
| Ae GNBP                 | - AT. KDN. . . . T. G. . T- - RGG. . SAKE. . . . . K. EE. . S. E. SL. V. . . V. . . 394         |
| An GNBP-B               | PA. . ANGN. . . . N. . T- - LRD. . LG. S. . . . . K. QE. . SAE. S. . V. . . V. . . 377          |

**Figure S1.** Multiple protein sequence alignment of a fragment of the *Culex pipiens quinquefasciatus* putative Gram-negative bacteria binding protein (CQ G1A1) with Gram-negative bacteria binding proteins (GNBPs) from other insects. Aligned protein sequences include the G1A1 putative translation product (311 amino acids; CQ G1A1 partial protein) GNBP from *Cx. p. quinquefasciatus*; (CQ GNBP, accession no. XP\_001845967.1),  $\beta$ -1,3 glucan recognition Protein-4 from *Bombyx mori* (BM b1,3 glucan rec P-4, accession no. NP\_001159614.1), GNBP from *Ae. aegypti* (Ae GNBP, accession no. XP\_001659797.1), and GNBP subgroup B from *Anopheles gambiae* (An GNBP-B, accession no. XM\_312118.3). The  $\beta$ -1,3-glucan binding domain is underlined. The dots represent amino acids that are the same as in the CQ G1A1 partial protein sequence, the numbering represents the amino acid number, the dashes are included to maximize spacing.

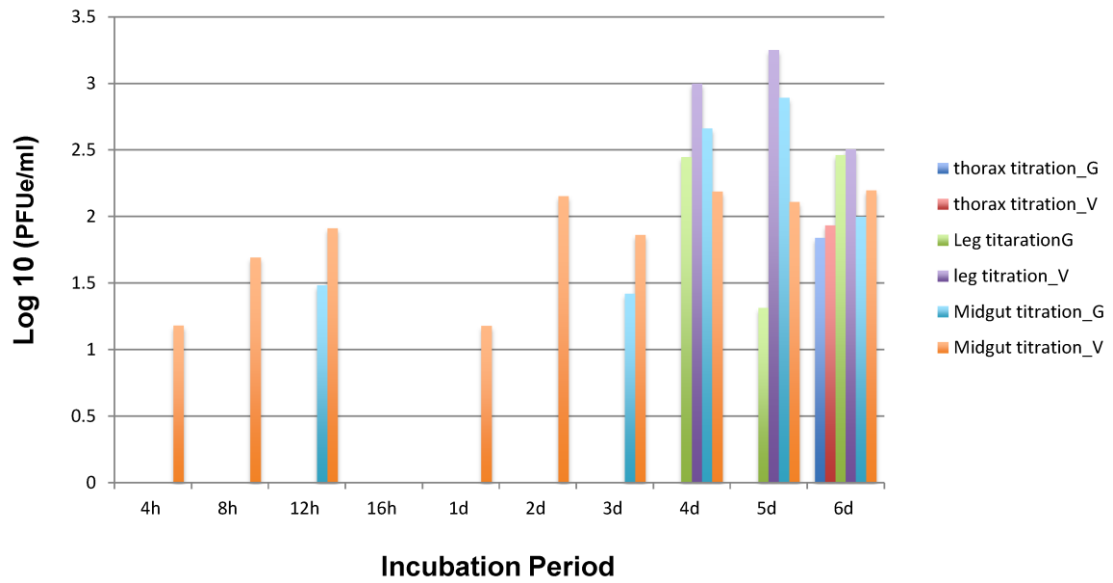

**Figure S2.** Titration of WNV in thorax, leg, and midgut tissues dissected from two populations of *Cx. quinquefasciatus* (CPQG and CPQV) at different incubation periods after infection. Gainesville = G; Vero Beach = V; h = hours post infection, d = days post infection.
